# Supplementary material for: Aerosol-assisted CVD of thioether-functionalised indium aminoalkoxides
Source: PubMed Central journal article supplement (PMC5504136; doi:10.1007/s00706-017-1980-2), 2017-06-02
Supplement: 706_2017_1980_MOESM1_ESM.pdf [file 706_2017_1980_MOESM1_ESM.pdf]

## Supporting Information

# Aerosol assisted CVD of thioether functionalised indium aminoalkoxides

Felix Biegger, Felix Jungwirth, Michael Stanislaus Seifner, Christoph Rameshan, Sven Barth\*

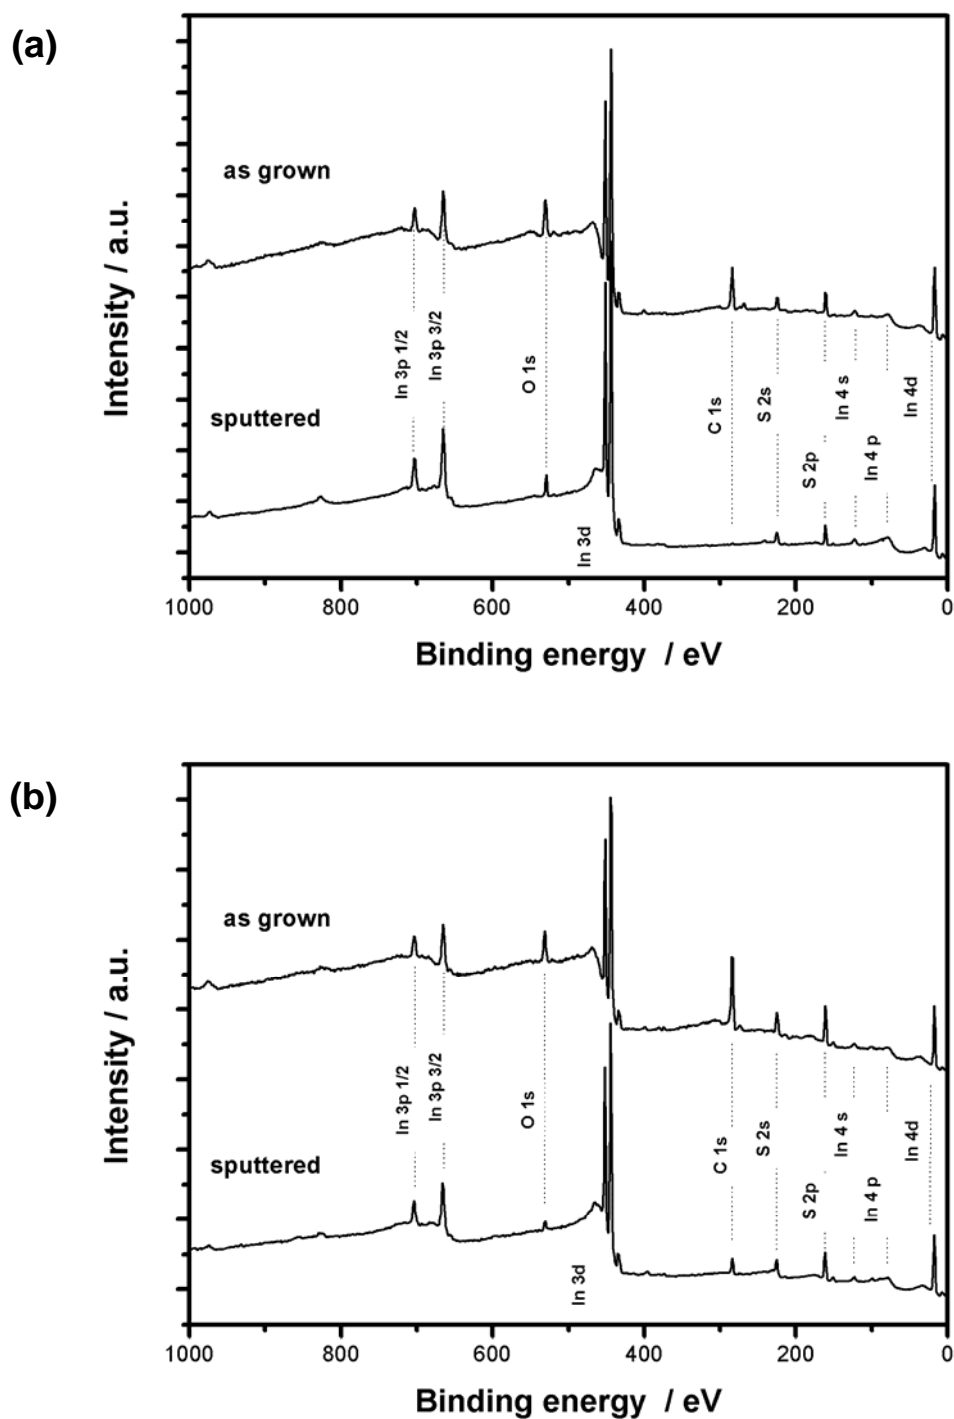

**Figure S1:** XPS survey of films obtained by AACVD using **In1** grown at (a) 400 °C before and after sputtering and (b) using **In4** 400 °C before and after sputtering. Spectra measured with Al K $\alpha$  radiation at room temperature.

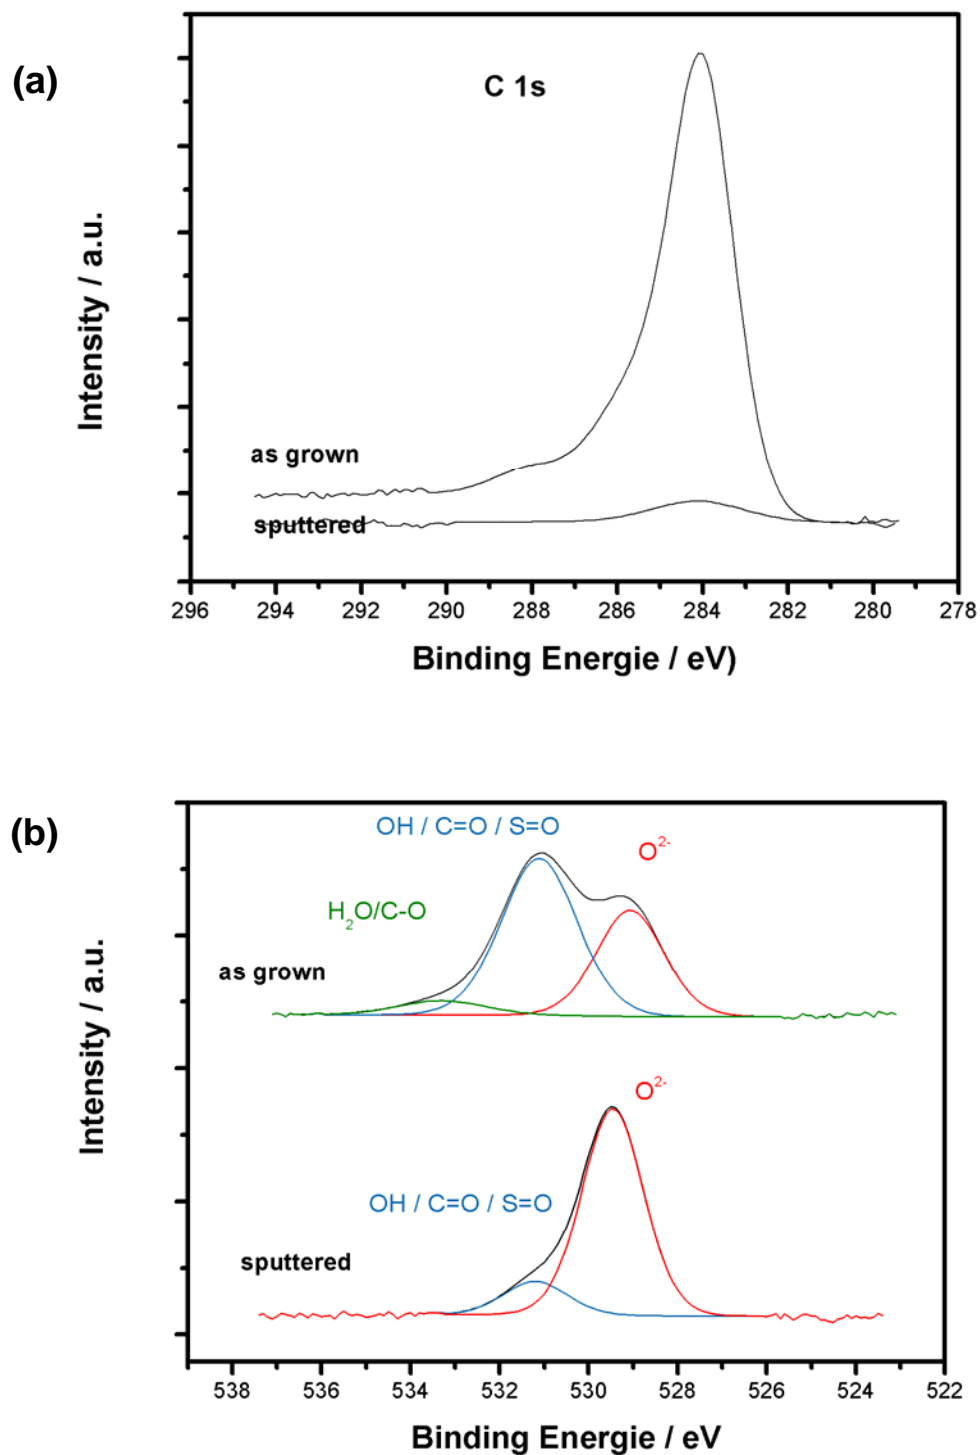

**Figure S2:** XPS spectra of the (a) C1s peak and (b) O1s peak of CVD deposits using **In1** at 400°C before and after sputtering recorded with an Al K $\alpha$  lab source.
